# Supplementary material for: Tunable Oxidized-Chitin Hydrogels with Customizable Mechanical Properties by Metal or Hydrogen Ion Exposure
Source: MDPI journal article supplement (doi:10.3390/md22040164), 2024-04-03
Supplement: s1 [file s1]

# **Tunable oxidized-chitin hydrogels with customizable mechanical properties by metal or hydrogen ion exposure**

A. Mucaria, D. Giuri, C. Tomasini, G. Falini and D. Montroni\*

Department of Chemistry "Giacomo Ciamician", University of Bologna, via F. Selmi 2, 40126 Bologna, Italy

## Index

|                                                                                                       |        |
|-------------------------------------------------------------------------------------------------------|--------|
| Figure S1. XRPD diffractograms - powder grain size optimization                                       | Page 2 |
| Figure S2. Uv-visible measurements                                                                    | Page 3 |
| Figure S3. $\alpha$ and $\beta$ -chitin FT-IR spectra                                                 | Page 3 |
| Figure S4. ss-NMR                                                                                     | Page 4 |
| Figure S5. XRPD diffractograms-time optimization spectra                                              | Page 5 |
| Figure S6. Amplitude sweep test of the ctrl and ctrl_H <sub>2</sub> Osample                           | Page 5 |
| Figure S7. Frequency sweep Calcium ions hydrogels                                                     | Page 6 |
| Figure S8. Frequency sweep hydrogels in different pH conditions                                       | Page 7 |
| Figure S9. Image of hydrogels after freeze-drying                                                     | Page 7 |
| Table S1. G' and G'' values of the various addition methods tested                                    | Page 8 |
| Table S2. G' and G'' values of the hydrogels in the presence of Mg <sup>2+</sup> ions and 450 mM NaCl | Page 8 |
| Table S3. Assignment of the ATR vibration bands of chitin hydrogels                                   | Page 9 |

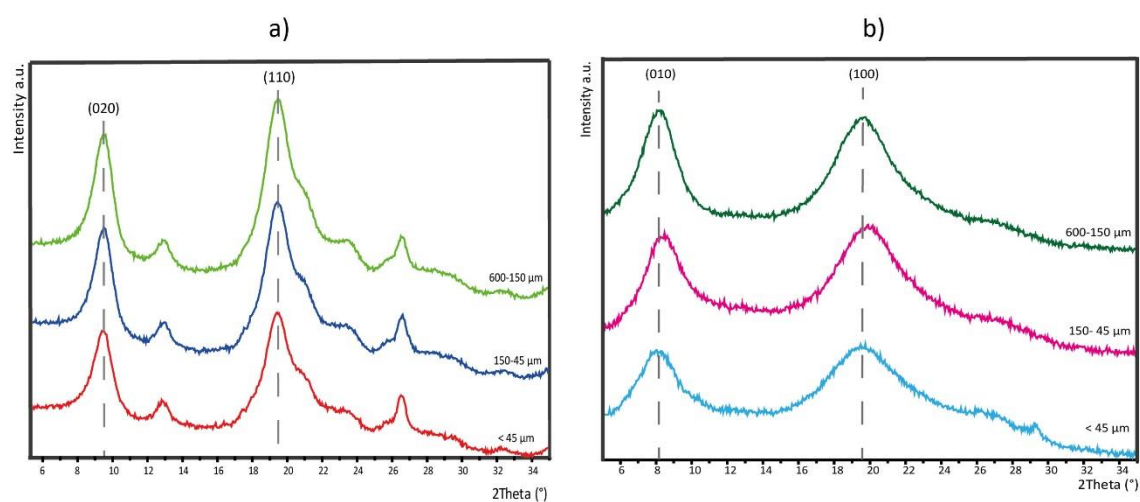

Figure S1. XRPD diffractogram of a)  $\alpha$ -chitin powder sieved at various sizes. Peak (110) is the convolution of two peaks, as evidenced by the asymmetric profile. A decrease in crystallinity is observed decreasing the grain size and of b)  $\beta$ -chitin powder sieved at various sizes. A decrease in crystallinity is observed decreasing the grain size.

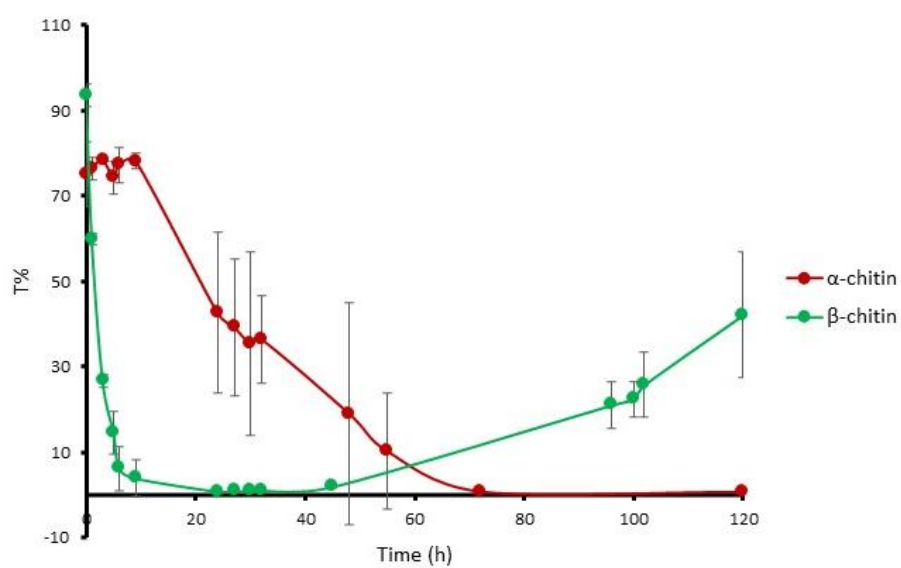

Figure S2. Transmittance variation during the oxidation of  $\alpha$ -chitin and  $\beta$ -chitin.

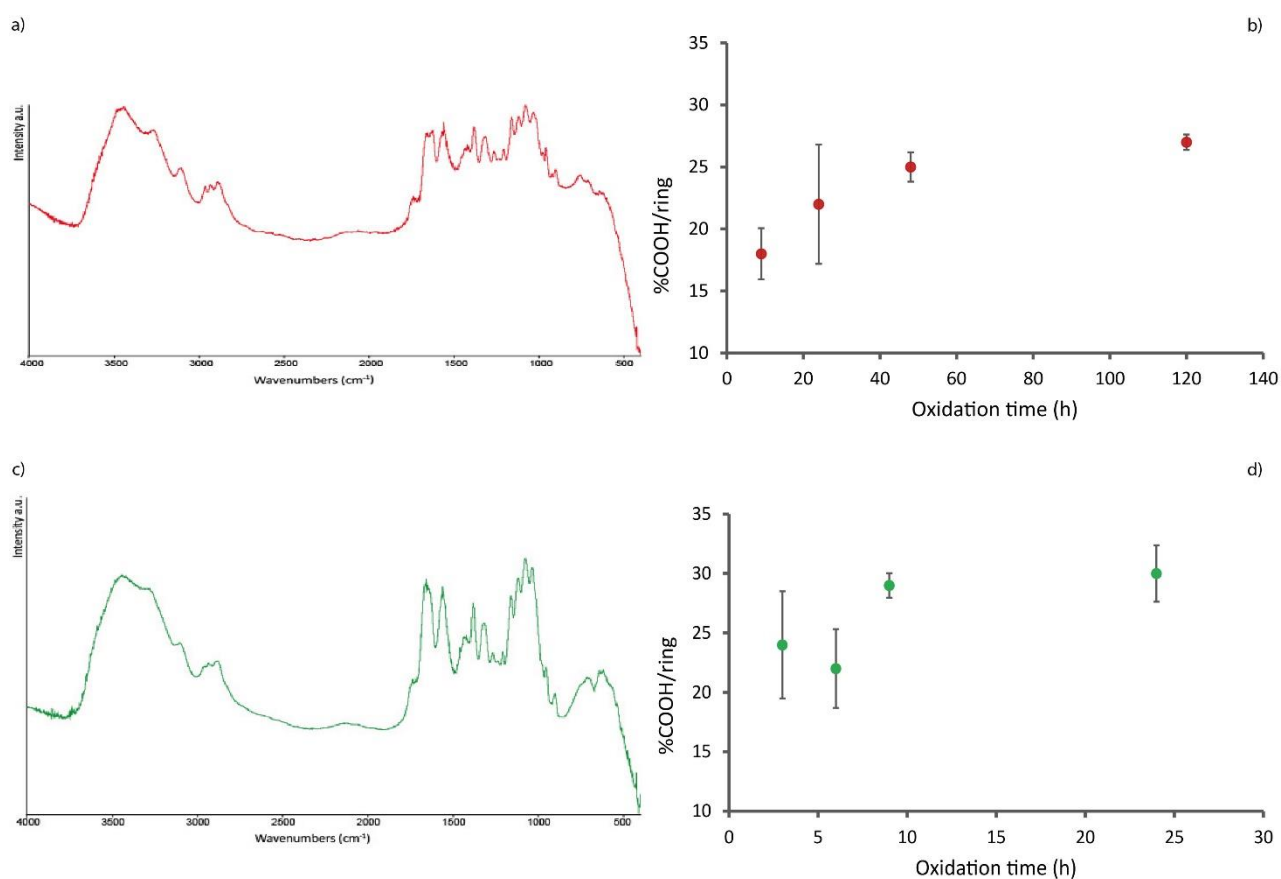

Figure S3. FTIR spectra of a)  $\alpha$ -chitin oxidized for 120 hours and b)  $\beta$ -chitin oxidized for 24 hours. The graphs show the relative intensity of the COOH band ( $1730\text{ cm}^{-1}$ ) as the oxidation time of b)  $\alpha$  and d)  $\beta$ -chitin increases.

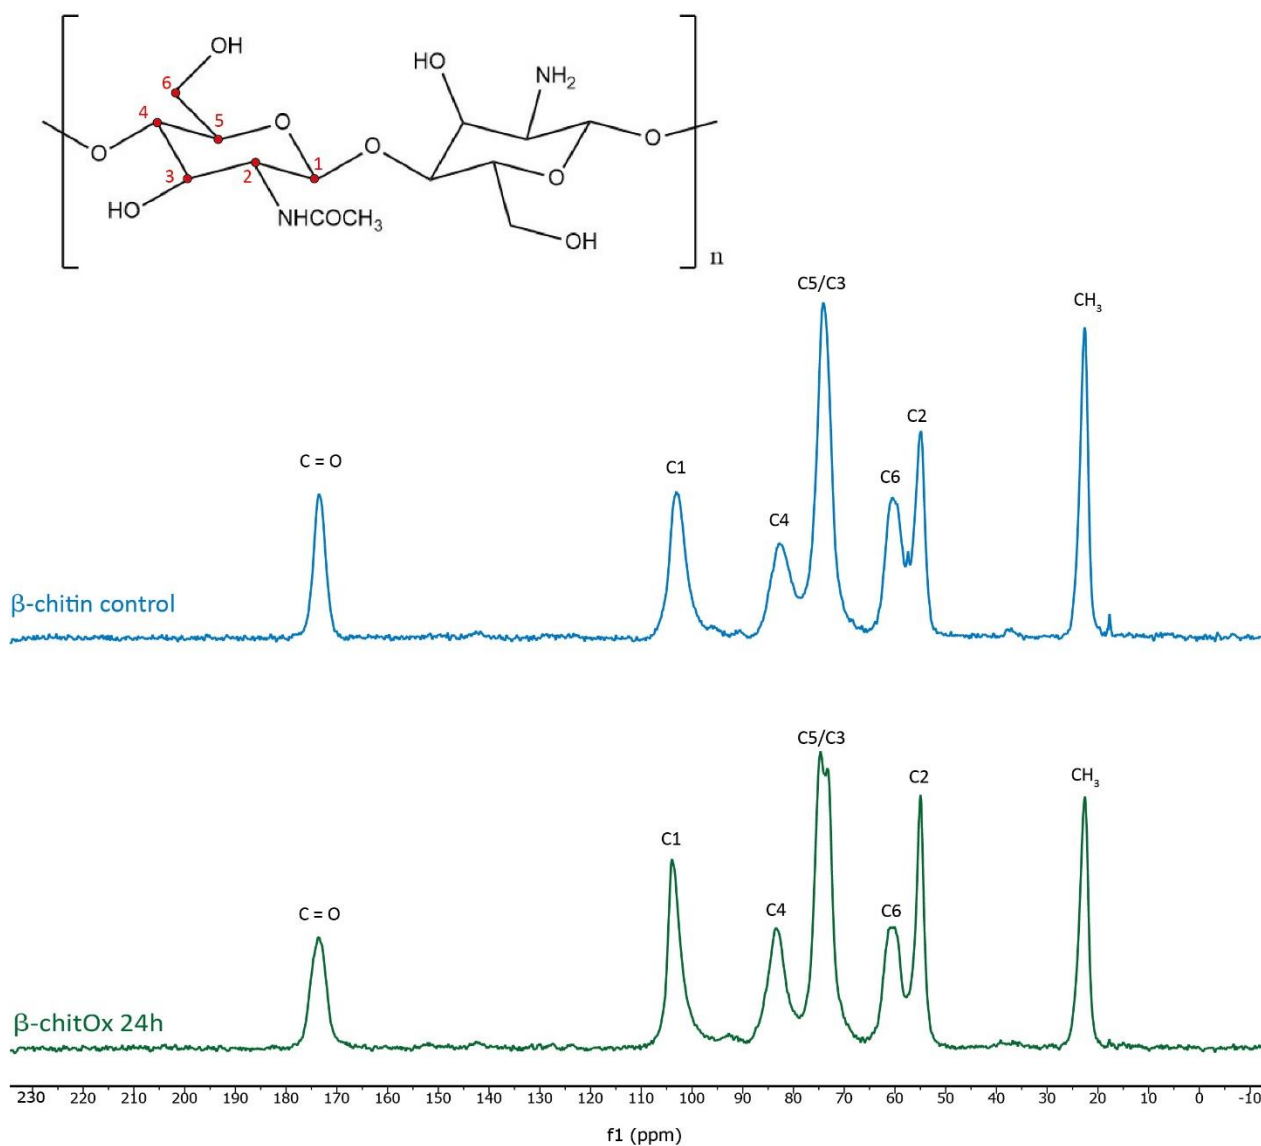

Figure S4. ss-NMR spectra of  $\beta$ -chitin control and oxidized  $\beta$ -chitin. The peaks obtained were assigned as shown in the image above [54,57]. In the spectrum of  $\beta$ -chitin oxidized for 24 hours, a decrease in the relative intensity of the C6 peak is observed.

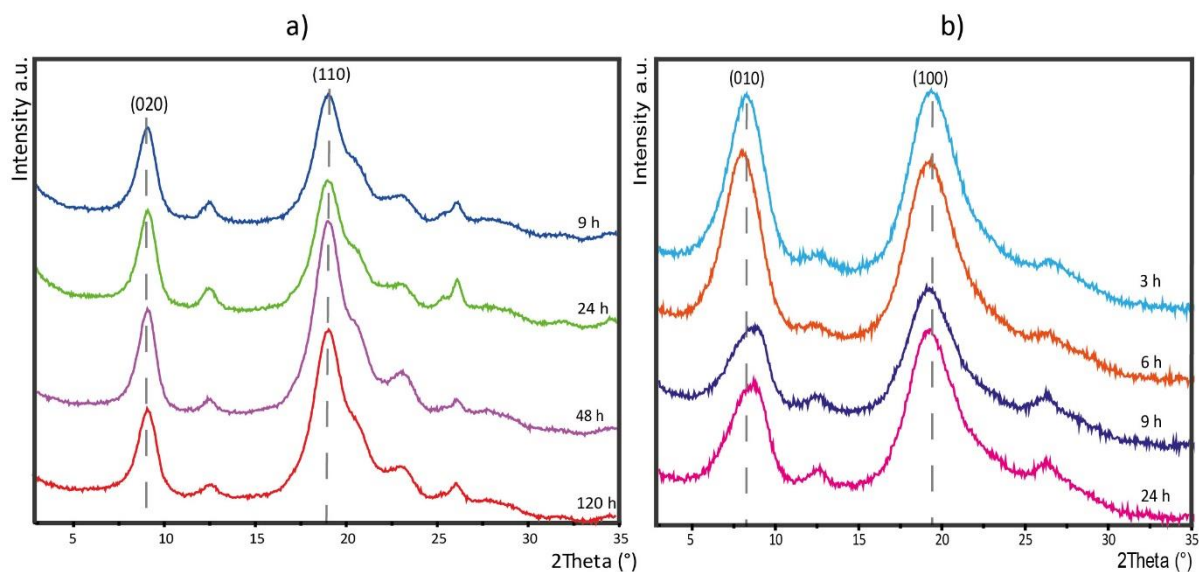

Figure S5. XRPD diffractogram of the different reaction products obtained from the oxidation of a)  $\alpha$ -chitin at various times; b)  $\beta$ -chitin at various times. Along the (010) direction a reduction of the cell parameter is observed increasing the reaction time. Conversely, along the (100) direction the crystallinity and the dimension of the lattice parameter increased.

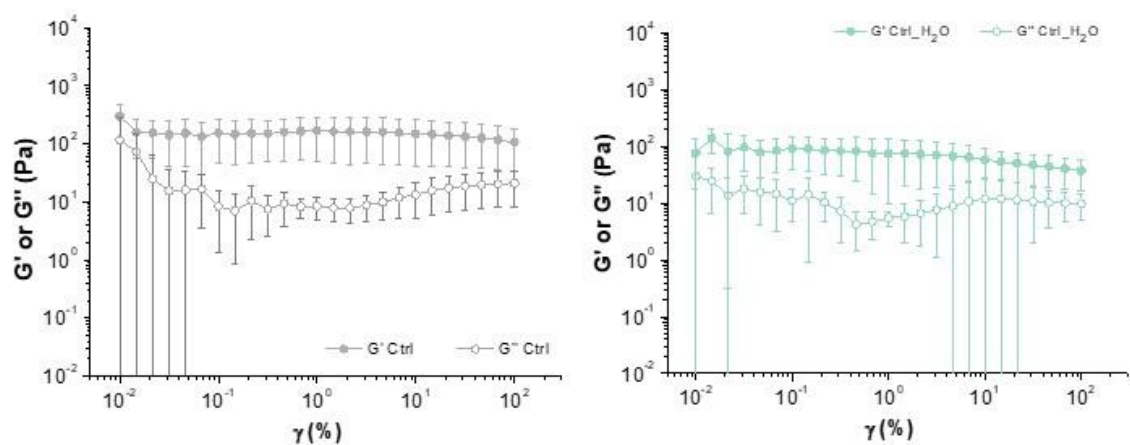

Figure S6. Amplitude sweep test of the ctrl and ctrl<sub>H<sub>2</sub>O</sub>sample. The bars indicate the error on the measurement.

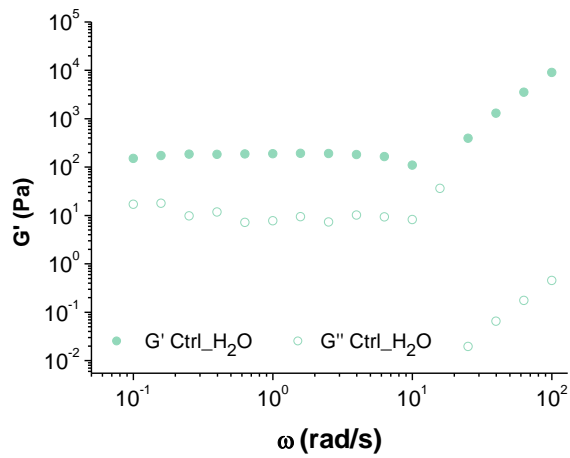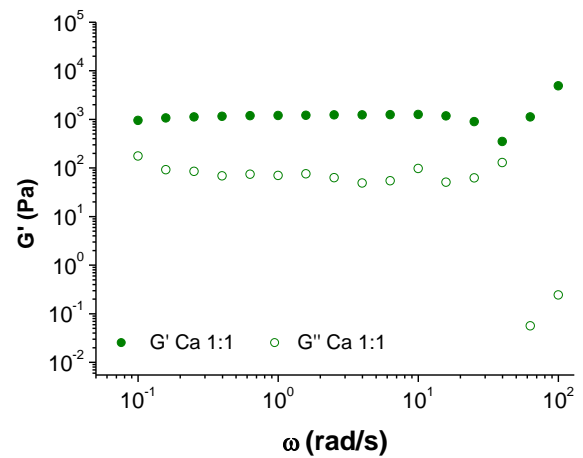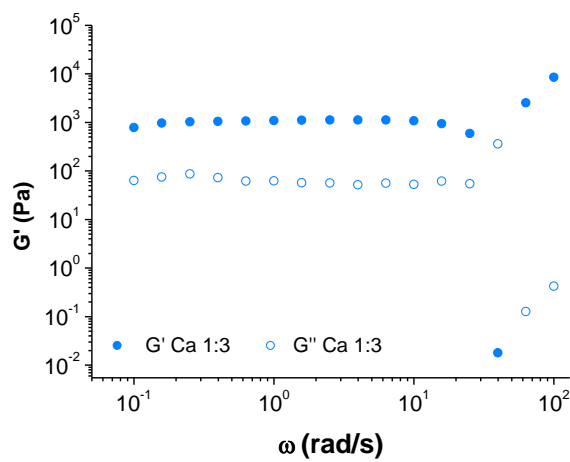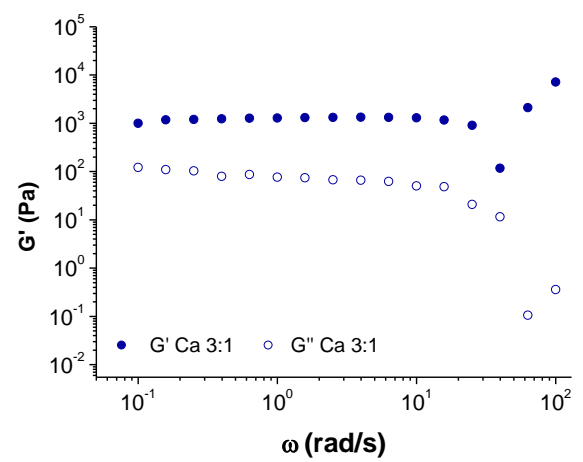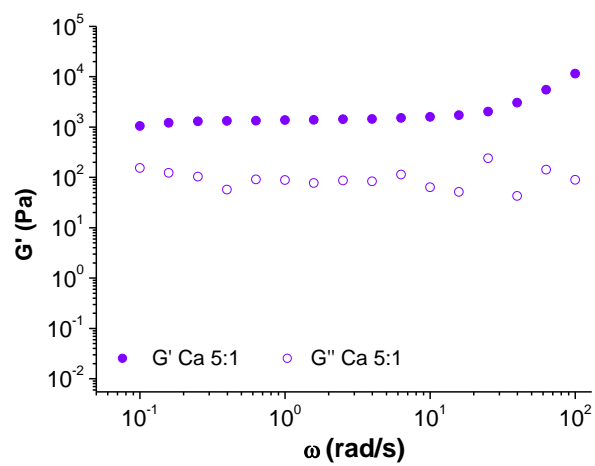

Figure S7. Frequency sweep of the samples: Ctrl\_H<sub>2</sub>O; Ca 1:1; Ca 1:3; Ca 3:1; Ca 5:1.

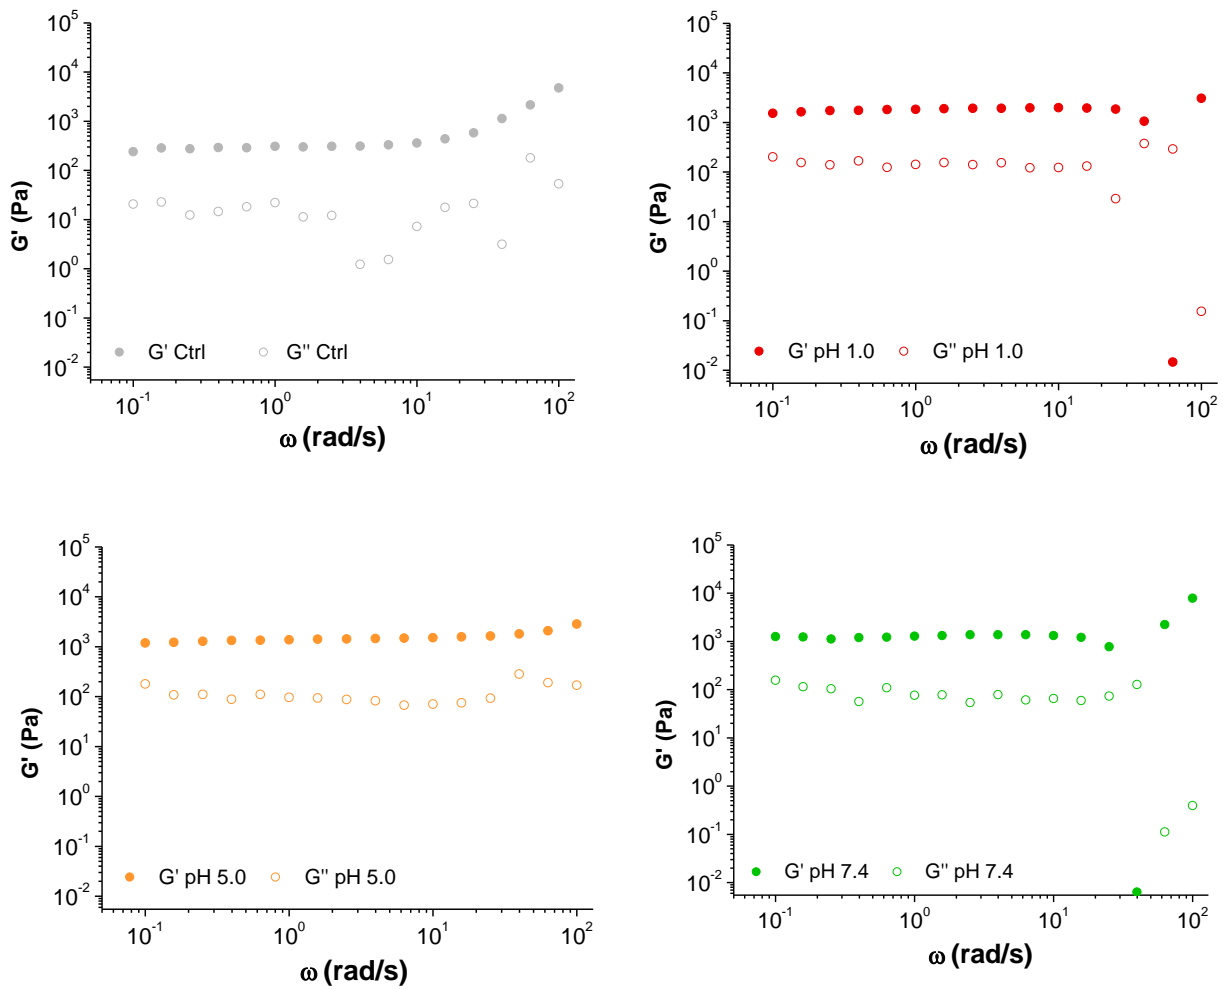

Figure S8. Frequency sweep of the samples: Ctrl; pH 1.0; pH 5.0; pH 7.4.

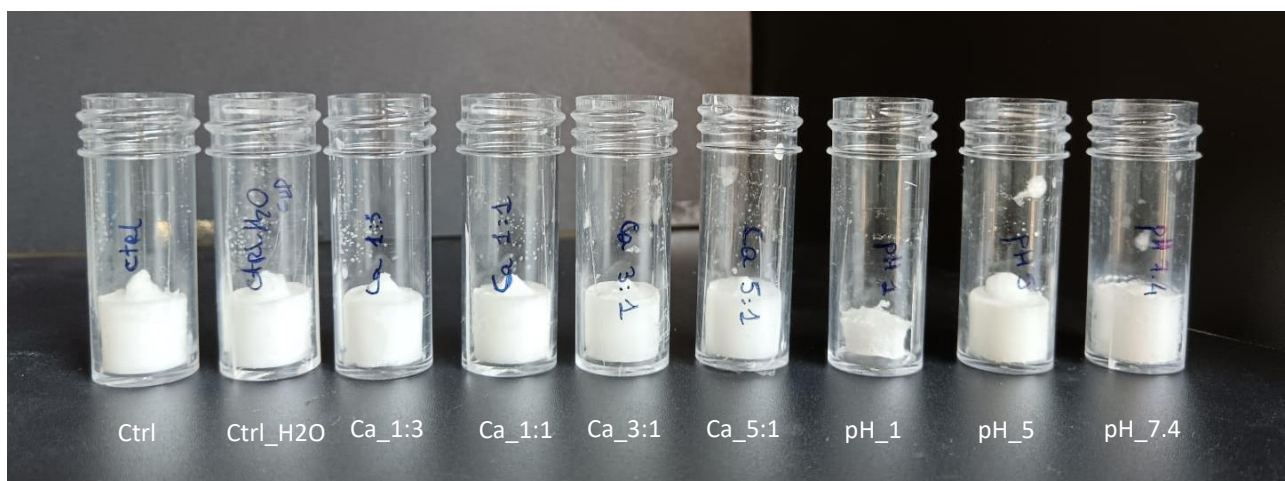

Figure S9. A picture reporting the hydrogels exposed to the different environments after freeze-drying. The image shows how the hydrogel maintained their original shape except for pH\_1, which shows a shrinkage.

Table S1.  $G'$  and  $G''$  values of the various addition methods tested corresponding to a shear strain of  $\gamma=0.046\%$ . Sup= surface addition; Mix=mixed addition; Presonic = addition before sonication step.

| Sample                         | Storage Modulus $G'$ ;<br>( $\gamma= 0,046\%$ ) | Loss Modulus $G''$ ;<br>( $\gamma= 0,046\%$ ) |
|--------------------------------|-------------------------------------------------|-----------------------------------------------|
|                                | [Pa]                                            | [Pa]                                          |
| Ctrl                           | $200 \pm 100$                                   | $20 \pm 20$                                   |
| Ctrl_H <sub>2</sub> Osup       | $80 \pm 50$                                     | $20 \pm 10$                                   |
| Ctrl_H <sub>2</sub> Omix       | $10 \pm 20$                                     | $20 \pm 20$                                   |
| Ctrl_H <sub>2</sub> O_presonic | $100 \pm 80$                                    | $10 \pm 10$                                   |
| Ca_1:1_mix                     | $500 \pm 100$                                   | $60 \pm 10$                                   |
| Ca_1:1_sup                     | $690 \pm 30$                                    | $40 \pm 20$                                   |
| Ca_1:1_presonic                | $120 \pm 50$                                    | $30 \pm 20$                                   |

Table S2.  $G'$  and  $G''$  values of the hydrogels in the presence of  $Mg^{2+}$  ions and 450 mM NaCl. The values correspond to the shear strain of  $\gamma=0.046\%$ .

| Sample                   | Storage Modulus $G'$ ;<br>( $\gamma= 0,046\%$ ) | Loss Modulus $G''$ ;<br>( $\gamma= 0,046\%$ ) |
|--------------------------|-------------------------------------------------|-----------------------------------------------|
|                          | [Pa]                                            | [Pa]                                          |
| Ctrl                     | $200 \pm 100$                                   | $20 \pm 20$                                   |
| Ctrl_H <sub>2</sub> Osup | $80 \pm 50$                                     | $20 \pm 10$                                   |
| Mg_3:1                   | $800 \pm 200$                                   | $50 \pm 10$                                   |
| NaCl                     | $650 \pm 70$                                    | $10 \pm 10$                                   |



Table S3. Assignment of the ATR vibration bands of chitin hydrogels [52].

| Vibrations mode                                                                | Ctrl_H <sub>2</sub> O | Ca_1:3 | Ca_1:1 | Ca_3:1 | Ca_5:1 | Ctrl | pH 1.0 | pH 5.0 | pH 7.4 |
|--------------------------------------------------------------------------------|-----------------------|--------|--------|--------|--------|------|--------|--------|--------|
| OH out of plane bending                                                        | 691                   | 689    | 684    | 689    | 667    | 688  | 669    | 689    | 686    |
| Ring stretching                                                                | 896                   | 897    | 900    | 897    | 899    | 894  | 898    | 898    | 901    |
| CH <sub>3</sub> wagging                                                        | 951                   | 951    | 952    | 952    | 952    | 952  | 949    | 951    | 950    |
| C-O stretching                                                                 | 1029                  | 1028   | 1027   | 1027   | 1025   | 1029 | 1026   | 1028   | 1028   |
| C-O stretching                                                                 | 1068                  | 1066   | 1065   | 1067   | 1064   | 1068 | 1060   | 1065   | 1063   |
| Asymmetric in phase ring stretching mode                                       | 1111                  | 1112   | 1111   | 1112   | 1110   | 1112 | 1108   | 1111   | 1111   |
| Asymmetric bridge oxygen stretching                                            | 1154                  | 1155   | 1154   | 1155   | 1153   | 1155 | 1153   | 1154   | 1153   |
| Amide III                                                                      | 1203                  | 1203   | 1202   | 1202   | 1203   | 1202 | 1203   | 1202   | 1202   |
| band and CH <sub>2</sub> wagging                                               | 1308                  | 1309   | 1309   | 1310   | 1312   | 1308 | 1309   | 1309   | 1310   |
| CH bending and symmetric CH <sub>3</sub> deformation                           | 1375                  | 1375   | 1375   | 1377   | 1377   | 1375 | 1374   | 1375   | 1377   |
| CH <sub>2</sub> bending and CH <sub>3</sub> deformation                        | 1428                  | 1430   | 1429   | 1429   | 1423   | 1429 | 1419   | 1420   | 1418   |
| Amide II band                                                                  | 1555                  | 1559   | 1554   | 1557   | 1557   | 1558 | 1559   | 1555   | 1557   |
| Amide I band                                                                   | 1630                  | 1636   | 1624   | 1627   | 1634   | 1634 | 1635   | 1624   | 1626   |
| Amide I band                                                                   | 1655                  | 1654   | 1653   | 1652   | 1651   | 1652 | /      | 1654   | 1656   |
| Symmetric CH <sub>3</sub> stretching and asymmetric CH <sub>2</sub> stretching | 2876                  | 2873   | 2874   | 2876   | 2880   | 2873 | 2874   | 2874   | 2874   |
| CH <sub>3</sub> stretching                                                     | 2920                  | 2935   | 2935   | 2937   | 2935   | 2930 | 2930   | 2935   | 2937   |
| N-H stretching                                                                 | 3099                  | 3100   | 3101   | 3100   | 3108   | 3094 | 3090   | 3100   | 3108   |
| N-H stretching                                                                 | 3281                  | 3272   | 3263   | 3271   | 3256   | 3280 | 3255   | 3275   | 3263   |
| O-H stretching                                                                 | 3435                  | 3427   | 3448   | 3425   | 3372   | 3437 | /      | 3421   | 3394   |

n.b. All reported values are expressed in cm<sup>-1</sup>.

## References

- [52] Montroni, D.; Fermani, S.; Morellato, K.; Torri, G.; Naggi, A.; Cristofolini, L.; Falini, G.  $\beta$ -Chitin Samples with Similar Microfibril Arrangement Change Mechanical Properties Varying the Degree of Acetylation. *Carbohydr. Polym.* **2019**, *207*, 26–33. <https://doi.org/10.1016/j.carbpol.2018.11.069>.
- [54] Montroni, D.; Sparla, F.; Fermani, S.; Falini, G. Influence of Proteins on Mechanical Properties of a Natural Chitin-Protein Composite. *Acta Biomater.* **2021**, *120*, 81–90. <https://doi.org/10.1016/j.actbio.2020.04.039>.

[57] Wang, Q.; Yan, X.; Chang, Y.; Ren, L.; Zhou, J. Fabrication and Characterization of Chitin Nanofibers through Esterification and Ultrasound Treatment. *Carbohydr. Polym.* **2018**, *180*, 81–87.  
<https://doi.org/10.1016/j.carbpol.2017.09.010>.
